# Supplementary material for: Structural Game Characteristics and Problematic Gaming
Source: Atypon-hosted journal article supplement (doi:10.1024/0939-5911/a000859), 2024-04-01
Supplement: 0939-5911_a000859_esm2.pdf [file 0939-5911_a000859_esm2.pdf]

# Electronic Supplementary Material

## ESM 2. Risk Characteristics Checklist for Games (RCCG, German language version)

Florian Rehbein<sup>1</sup>, Douglas A. Gentile<sup>2</sup>, Jeroen Lemmens<sup>3</sup>, Hans-Jürgen Rumpf<sup>4</sup>

<sup>1</sup> FH Münster – University of Applied Sciences, Münster, Germany

<sup>2</sup> Iowa State University, Department of Psychology, Ames, USA

<sup>3</sup> University of Amsterdam, Amsterdam School of Communication Research, Amsterdam, Niederlande

<sup>4</sup> Universität zu Lübeck, Klinik für Psychiatrie und Psychotherapie, Lübeck, Deutschland

**Zitation:** Rehbein, F., Douglas, D. A., Lemmens, J., & Rumpf, H.-J. (2024). Structural Game Characteristics and Problematic Gaming: Introduction of the Risk Characteristics Checklist for Games (RCCG). *SUCHT, 70* (2), 77–86.

### Anwendungszweck:

Die RCCG kann verwendet werden, um bestimmte strukturelle Merkmale von Videospiele zu erfassen, zu beschreiben und zu bewerten, von denen erwartet werden kann, dass sie zum Risiko dysfunktionalen Spielens im Sinne einer Computerspielstörung (Gaming Disorder) beitragen. Die RCCG kann für Spiele verschiedener Genres verwendet werden, für Online- und Offline-Spiele sowie für Spiele auf mobile und stationäre Systeme.

### A) Allgemeine Informationen

#### A1. Spieltitel, Publisher

#### A2. Testdatum

#### A3. Spielversion (build)

#### A4. Genre

##### Hauptgenre

##### Sub-Genre

*Brain and Skill*

- Card games
- Puzzle games
- Board games
- Quiz games
- Skill games
- Fitness games
- Music games

## Electronic Supplementary Material

|                                                                                |                                                                                                                                                                                                                                                                                                |
|--------------------------------------------------------------------------------|------------------------------------------------------------------------------------------------------------------------------------------------------------------------------------------------------------------------------------------------------------------------------------------------|
|                                                                                | <input type="radio"/> Party Games<br><input type="radio"/> Hidden object games<br><input type="radio"/> Game collections                                                                                                                                                                       |
| <input type="radio"/> <i>Sports</i>                                            | <input type="radio"/> Sports games                                                                                                                                                                                                                                                             |
| <input type="radio"/> <i>Racing</i>                                            | <input type="radio"/> Racing games                                                                                                                                                                                                                                                             |
| <input type="radio"/> <i>Simulation</i>                                        | <input type="radio"/> Simulation and construction<br><input type="radio"/> Life simulation games<br><input type="radio"/> Business simulation games<br><input type="radio"/> Sandbox physics games<br><input type="radio"/> Flight simulation games                                            |
| <input type="radio"/> <i>Action and adventure</i>                              | <input type="radio"/> Action-Adventure games<br><input type="radio"/> Jump'n'Run games<br><input type="radio"/> Adventure games<br><input type="radio"/> Action games<br><input type="radio"/> Survival games<br><input type="radio"/> Arcade games<br><input type="radio"/> Beat 'em up games |
| <input type="radio"/> <i>Shooter</i>                                           | <input type="radio"/> First-person shooter games<br><input type="radio"/> Third-person shooter games<br><input type="radio"/> Shoot 'em up games<br><input type="radio"/> MOBA shooter games<br><input type="radio"/> Battle royale shooter games<br><input type="radio"/> Survival games      |
| <input type="radio"/> <i>Strategy</i>                                          | <input type="radio"/> Strategy games<br><input type="radio"/> Real time strategy games<br><input type="radio"/> MOBA strategy                                                                                                                                                                  |
| <input type="radio"/> <i>Role-playing</i>                                      | <input type="radio"/> Role playing games<br><input type="radio"/> Action role playing games<br><input type="radio"/> MMORPGs                                                                                                                                                                   |
| <input type="radio"/> <b>Keine eindeutige Zuordnung zu einem Genre möglich</b> | <b>Bitte beschreiben Sie den allgemeinen Spielinhalt:</b>                                                                                                                                                                                                                                      |

## Electronic Supplementary Material

| <b>A5. Derzeit kann das Spiel auf folgenden Plattformen gespielt werden (Mehrfachnennung möglich)</b> |                       |                       |                       |                       |                       |  |
|-------------------------------------------------------------------------------------------------------|-----------------------|-----------------------|-----------------------|-----------------------|-----------------------|--|
| <i>Playstation</i>                                                                                    | <i>XBOX</i>           | <i>Nintendo</i>       | <i>PC/MAC</i>         | <i>Mobil</i>          | <i>Browser</i>        |  |
| <input type="radio"/>                                                                                 | <input type="radio"/> | <input type="radio"/> | <input type="radio"/> | <input type="radio"/> | <input type="radio"/> |  |

| <b>A6. Für diesen Test verwendete Plattformen (Mehrfachnennung möglich)</b> |                       |                       |                       |                       |                       |  |
|-----------------------------------------------------------------------------|-----------------------|-----------------------|-----------------------|-----------------------|-----------------------|--|
| <i>Playstation</i>                                                          | <i>XBOX</i>           | <i>Nintendo</i>       | <i>PC/MAC</i>         | <i>Mobil</i>          | <i>Browser</i>        |  |
| <input type="radio"/>                                                       | <input type="radio"/> | <input type="radio"/> | <input type="radio"/> | <input type="radio"/> | <input type="radio"/> |  |

| <b>A7. Online Inhalte</b>                                 |                                                   |                                                          |
|-----------------------------------------------------------|---------------------------------------------------|----------------------------------------------------------|
| <i>Onlinespiel ohne signifikante Offlinespielinhalten</i> | <i>Spiel mit Online- und Offlinespielinhalten</i> | <i>Offlinespiel ohne signifikante Onlinespielinhalte</i> |
| <input type="radio"/>                                     | <input type="radio"/>                             | <input type="radio"/>                                    |

| <b>A8. Altersklassifikationen</b> |                                    |                                     |                                     |                                     |                                     |                                                |
|-----------------------------------|------------------------------------|-------------------------------------|-------------------------------------|-------------------------------------|-------------------------------------|------------------------------------------------|
| <i>USK</i>                        | <b>0+</b><br><input type="radio"/> | <b>6+</b><br><input type="radio"/>  | <b>12+</b><br><input type="radio"/> | <b>16+</b><br><input type="radio"/> | <b>18+</b><br><input type="radio"/> | <b>Nicht bewertet</b><br><input type="radio"/> |
| <i>PEGI</i>                       | <b>3+</b><br><input type="radio"/> | <b>7+</b><br><input type="radio"/>  | <b>12+</b><br><input type="radio"/> | <b>16+</b><br><input type="radio"/> | <b>18+</b><br><input type="radio"/> | <b>Nicht bewertet</b><br><input type="radio"/> |
| <i>ESRB</i>                       | <b>0+</b><br><input type="radio"/> | <b>10+</b><br><input type="radio"/> | <b>13+</b><br><input type="radio"/> | <b>17+</b><br><input type="radio"/> | <b>18+</b><br><input type="radio"/> | <b>Nicht bewertet</b><br><input type="radio"/> |

| <b>A9. Vertriebsmodell</b>                               |                                                       |                                            |                                          |
|----------------------------------------------------------|-------------------------------------------------------|--------------------------------------------|------------------------------------------|
| <i>Buy-to-play<br/>(no additional in-game purchases)</i> | <i>Buy-to-play<br/>(additional in-game purchases)</i> | <i>Pay-to-play<br/>(paid subscription)</i> | <i>Free-to-play<br/>(Freemium Model)</i> |
| <input type="radio"/>                                    | <input type="radio"/>                                 | <input type="radio"/>                      | <input type="radio"/>                    |

# Electronic Supplementary Material

## B) Strukturelle Nähe des Spiels zu Glücksspielangeboten

|                                                                                                                                                                                                                                                                                                                                                                                                                                      |  |  |
|--------------------------------------------------------------------------------------------------------------------------------------------------------------------------------------------------------------------------------------------------------------------------------------------------------------------------------------------------------------------------------------------------------------------------------------|--|--|
| <p><b>B1. Spieler*innen können zufällig oder unvorhersehbar<sup>1</sup> vergebene virtuelle Belohnungen<sup>2</sup> (z. B. Beutekisten/Lootboxen) erwerben...</b></p> <ul style="list-style-type: none"> <li>- gegen Echtgeldzahlungen<br/>oder</li> <li>- gegen den Einsatz eines virtuellen Wertäquivalents (z. B. einer fiktiven Spielwährung), die wiederum durch Echtgeldzahlungen erworben werden kann<sup>3</sup>.</li> </ul> |  |  |
| <p><b>Dieses Feature ist:</b>                      <input type="radio"/> vorhanden                      <input type="radio"/> nicht vorhanden</p>                                                                                                                                                                                                                                                                                    |  |  |
| <p><b>Ggfls. Erläuterungen:</b></p>                                                                                                                                                                                                                                                                                                                                                                                                  |  |  |

## C) Risikoerhöhende und risikomindernde strukturelle Spielmerkmale

| <p><b>C1. Geben Sie zu jeder der nachfolgend aufgeführten Belohnungsgruppen<sup>4</sup> an, ob diese in dem Spiel vorhanden sind.</b></p> <p><b>Geben Sie immer dann „ja“ an, wenn eine Belohnungsgruppe Spieler*innen mindestens in einem Teil oder einer Phase des Spiels <u>potentiell zur Verfügung stehen kann</u>. Belohnungen müssen auch als vorhanden angesehen werden, wenn sie durch Einkäufe oder Weiterverarbeitung von Rohstoffen, Ressourcen oder Materialien erhalten werden können.</b></p> |                          |                            |
|--------------------------------------------------------------------------------------------------------------------------------------------------------------------------------------------------------------------------------------------------------------------------------------------------------------------------------------------------------------------------------------------------------------------------------------------------------------------------------------------------------------|--------------------------|----------------------------|
| Allgemein                                                                                                                                                                                                                                                                                                                                                                                                                                                                                                    |                          |                            |
| Punkte (allgemeiner Punktestand, z. B. High-Score)                                                                                                                                                                                                                                                                                                                                                                                                                                                           | <input type="radio"/> ja | <input type="radio"/> nein |
| Auszeichnungen (z. B. Achievements, Abzeichen, Trophäen, o.ä.)                                                                                                                                                                                                                                                                                                                                                                                                                                               | <input type="radio"/> ja | <input type="radio"/> nein |
| Platzierungen auf einer Rangliste                                                                                                                                                                                                                                                                                                                                                                                                                                                                            | <input type="radio"/> ja | <input type="radio"/> nein |
| Sammelgegenstände (die Zielsetzung besteht in der Regel darin, möglichst viele dieser Objekte finden, erhalten und sammeln zu wollen)                                                                                                                                                                                                                                                                                                                                                                        | <input type="radio"/> ja | <input type="radio"/> nein |
| Permanent verfügbare individuelle Leistungsstatistiken (z. B. Anzahl Kills, zurückgelegte Distanz, entdeckte/besuchte Orte etc.)                                                                                                                                                                                                                                                                                                                                                                             | <input type="radio"/> ja | <input type="radio"/> nein |

<sup>1</sup> Erläuterung „zufällig oder unvorhersehbar“: Entscheidend ist hierbei, dass die Spieler\*innen nicht genau vorhersehen können, welche Belohnungen sie im Einzelnen erhalten werden. Der Eindruck der Unvorhersehbarkeit muss nicht unbedingt auf einer echten mathematischen Zufälligkeit beruhen.

<sup>2</sup> Belohnungen sind positiv konnotierte Spielereignisse, bei denen Spieler in der Regel etwas erhalten oder erreichen (Referenz siehe C1). Belohnungen müssen nicht unbedingt einen Vorteil für den Spielerfolg bedingen.

<sup>3</sup> Nicht entscheidend ist hierbei, ob die Spielwährung auch ohne In-Game-Käufe erworben werden kann (z. B. durch Spielhandlungen).

<sup>4</sup> Unter Belohnungsgruppen sind in sich homogene Gruppen von Belohnungen zu verstehen, die sich hinsichtlich ihrer Vorteile für die Spieler\*innen voneinander unterscheiden lassen (Beispiel: In einem Spiel können verschiedene Gegenstände/Items gefunden werden. Mit einigen dieser Items, wie z. B. Stock, Messer, Beil und Pistole aus der Belohnungsgruppe „Waffen“, können die Spieler\*innen Monstern Schaden zufügen.

## Electronic Supplementary Material

| <b>Erfahrungspunkte &amp; Leveln</b>                                                                                          |                          |                            |
|-------------------------------------------------------------------------------------------------------------------------------|--------------------------|----------------------------|
| Erfahrungspunkte, o.ä. (z. B. zum Aufstieg im Erfahrungslevel benötigt)                                                       | <input type="radio"/> ja | <input type="radio"/> nein |
| Aufstieg im Erfahrungslevel <sup>5</sup> , o.ä.                                                                               | <input type="radio"/> ja | <input type="radio"/> nein |
| <b>Verbesserung der Avatar<sup>6</sup>-Attribute (Fähigkeitszuwachs)<sup>7</sup></b>                                          |                          |                            |
| Gesamtkapazität von Lebensenergie, der Beschleunigung von dessen Regeneration, o.ä.                                           | <input type="radio"/> ja | <input type="radio"/> nein |
| Ausdauer/Kondition, der Beschleunigung von dessen Regeneration, o.ä.                                                          | <input type="radio"/> ja | <input type="radio"/> nein |
| Positive Avatar-Zustände, o.ä. (z. B. ausgeruht, satt, hydriert, glücklich, wach, verliebt)                                   | <input type="radio"/> ja | <input type="radio"/> nein |
| Kraft/Stärke, o.ä.                                                                                                            | <input type="radio"/> ja | <input type="radio"/> nein |
| Geschicklichkeit, o.ä.                                                                                                        | <input type="radio"/> ja | <input type="radio"/> nein |
| Intelligenz, Hackerfähigkeiten, Science Skills, o.ä.                                                                          | <input type="radio"/> ja | <input type="radio"/> nein |
| Kommunikation, Überzeugungskraft, zusätzliche Dialogoptionen, o.ä.                                                            | <input type="radio"/> ja | <input type="radio"/> nein |
| Angriff und/oder Verteidigung, o.ä. (besser Zielen, mehr Schaden pro Treffer, Zaubersprüche, o.ä.)                            | <input type="radio"/> ja | <input type="radio"/> nein |
| Rüstungswert, die Schadenstoleranz, o.ä.                                                                                      | <input type="radio"/> ja | <input type="radio"/> nein |
| spezifische Resistenzen oder Immunitäten (z. B. Gegenüber Kälte, Hitze, Strom, Strahlung, Krankheitserregern o.ä.)            | <input type="radio"/> ja | <input type="radio"/> nein |
| Fähigkeiten der Fortbewegung o.ä. (Laufen, Schleichen, Schwimmen, Tauchen, Fahren, Reiten, Fliegen, Klettern, Springen, etc.) | <input type="radio"/> ja | <input type="radio"/> nein |
| <b>Gegenstände (Items)</b>                                                                                                    |                          |                            |
| Rohstoffe, Ressourcen, o.ä. (häufig nicht direkt nutzbar, häufig mögliche Weiterverarbeitung)                                 | <input type="radio"/> ja | <input type="radio"/> nein |
| Veredelte Rohstoffe, Ressourcen, o.ä. (z. B. aus Erz und Kohle gewonnenes Eisen)                                              | <input type="radio"/> ja | <input type="radio"/> nein |
| Waffen                                                                                                                        | <input type="radio"/> ja | <input type="radio"/> nein |
| Verbesserungen für Waffen, o.ä. (z. B. Waffenteile, Waffenmodifikationen oder -upgrades, Zauber für Waffen, o.ä.)             | <input type="radio"/> ja | <input type="radio"/> nein |
| Munition, o.ä. (z. B. Magazine, Patronen, Pfeile, Bolzen, etc.)                                                               | <input type="radio"/> ja | <input type="radio"/> nein |

<sup>5</sup> Unter Erfahrungslevel sind Fortschrittssysteme zu verstehen, in denen der Spieler Stück für Stück höhere Level erreichen kann. Levelsysteme können sich in Bezug auf andere mit dem Level verbundene Belohnungen unterscheiden (z. B. Verstärkung von Attributen, Freischalten neuer Spielmodi, Freischalten neuer Ausrüstung, o.ä.).

<sup>6</sup> Beim Avatar handelt es sich um die digitale Hauptrepräsentation des Spielers im Spiel. Er kann menschlich oder menschenähnlich sein, ein Tier, eine Kreatur oder ein unbelebtes Objekt (Auto, Fahrzeug etc.).

<sup>7</sup> In einigen Spielen werden diese Verbesserungen durch den Erhalt anderer Belohnungen ausgelöst (z. B. verbessert ein besonderer Sattel die Fähigkeit zu reiten).

## Electronic Supplementary Material

|                                                                                                                                                         |                          |                            |
|---------------------------------------------------------------------------------------------------------------------------------------------------------|--------------------------|----------------------------|
| Verbesserung für Munition, o.ä. (z. B. Gift für Pfeile, größeres Eindringen von Kugeln)                                                                 | <input type="radio"/> ja | <input type="radio"/> nein |
| Werkzeuge                                                                                                                                               | <input type="radio"/> ja | <input type="radio"/> nein |
| Verbesserungen für Werkzeuge, o.ä. (Werkzeugteile, Werkzeugmodifikationen oder -upgrades, Zauber für Werkzeug, etc.)                                    | <input type="radio"/> ja | <input type="radio"/> nein |
| Skins (Texturen, z. B. für Waffen, Charaktere, o.ä.)                                                                                                    | <input type="radio"/> ja | <input type="radio"/> nein |
| Fahrzeuge/Reittiere (z. B. Autos, LKW, Motorräder, Luftfahrzeuge, Wasserfahrzeuge, Pferde, o.ä.)                                                        | <input type="radio"/> ja | <input type="radio"/> nein |
| Verbesserungen für Fahrzeuge/Reittiere (Tuning Teile, Fahrzeugmodifikationen, Sattel, etc.)                                                             | <input type="radio"/> ja | <input type="radio"/> nein |
| Attribute/Fähigkeiten von Fahrzeugen/Reittieren können zunehmen (z. B. Geschwindigkeit, Leistung, Stärke, Ausdauer etc.)                                | <input type="radio"/> ja | <input type="radio"/> nein |
| Tiere, Kreaturen, o.ä. <sup>8</sup> (z. B. Haustiere oder Begleittiere, keine Reittiere)                                                                | <input type="radio"/> ja | <input type="radio"/> nein |
| Ergänzende Items für Tiere, Kreaturen, o.ä. (Halsband, Leine, Bekleidung, Nahrung, etc.)                                                                | <input type="radio"/> ja | <input type="radio"/> nein |
| Attribute/Fähigkeiten von Tieren, Kreaturen, o.ä. können zunehmen (z. B. Geschwindigkeit, Leistung, Stärke, Ausdauer etc.)                              | <input type="radio"/> ja | <input type="radio"/> nein |
| Gebäude, Häuser, Wohnungen, o.ä.                                                                                                                        | <input type="radio"/> ja | <input type="radio"/> nein |
| Heilmittel wie z. B. Heiltränke, Medizin, Verbände, Medipacks, Nahrung, Getränke, etc. (Gesundheit regenerieren, wiederherstellen, wiederbeleben, etc.) | <input type="radio"/> ja | <input type="radio"/> nein |
| Kleidungsstücke                                                                                                                                         | <input type="radio"/> ja | <input type="radio"/> nein |
| Schutzausrüstung/Schilder (Schutzschild, Panzerung, Körperschutz, Helm, etc.)                                                                           | <input type="radio"/> ja | <input type="radio"/> nein |
| Ausrüstung o.ä. (nicht Kleidung, nicht Waffen, nicht Werkzeuge; z. B. Rucksack, Fernrohr, Kompass, Kamera, Sensor, Nachtsichtgerät)                     | <input type="radio"/> ja | <input type="radio"/> nein |
| Dokumente, o.ä. (z. B. Briefe, E-Mails, Nachrichten, Schatzkarten, Zahlencodes)                                                                         | <input type="radio"/> ja | <input type="radio"/> nein |
| Keycards, Schlüssel, o.ä.                                                                                                                               | <input type="radio"/> ja | <input type="radio"/> nein |
| Maschinen, Produktionsanlagen, Förderbänder, o.ä.                                                                                                       | <input type="radio"/> ja | <input type="radio"/> nein |
| Baumaterialien und Bausegmente (z. B. Zement, Wand, Tür, etc.)                                                                                          | <input type="radio"/> ja | <input type="radio"/> nein |
| Nahrung und/oder Getränke (Verhungern und/oder Verdursten verhindern)                                                                                   | <input type="radio"/> ja | <input type="radio"/> nein |
| Zu konsumierende (aufzubrauchende) Items, um Fähigkeiten für eine gewisse Zeitdauer zu erhöhen (Zaubertränke, Medikamente, Alkohol, Drogen o.ä.)        | <input type="radio"/> ja | <input type="radio"/> nein |
| Zu konsumierende (aufzubrauchende) Items, um Fähigkeiten langfristig zu erhöhen (z. B. Schriftstücke lesen, um Fähigkeiten zu erlernen).                | <input type="radio"/> ja | <input type="radio"/> nein |

<sup>8</sup> Wenn (erst) durch den Erwerb von Tieren, Kreaturen etc. neue Items bzw. Fähigkeiten zur Verfügung stehen, werden diese ebenfalls im Fragebogen angekreuzt.

## Electronic Supplementary Material

|                                                                                                                                                                                                                                                                                     |                          |                            |
|-------------------------------------------------------------------------------------------------------------------------------------------------------------------------------------------------------------------------------------------------------------------------------------|--------------------------|----------------------------|
| Einrichtungsgegenstände, o.ä. (z. B. Möbel, Dekoration, etc.)                                                                                                                                                                                                                       | <input type="radio"/> ja | <input type="radio"/> nein |
| Personen, Personengruppen, Soldaten, Berufsgruppen, o.ä. (kann direkt oder nicht direkt steuerbar sein, z. B. Gefährten, Soldaten, Einheiten)                                                                                                                                       | <input type="radio"/> ja | <input type="radio"/> nein |
| Ergänzende Items für Personen, Personengruppen, Soldaten, Berufsgruppen, o.ä. (z. B. Waffe, Bekleidung, Ausrüstung, etc.)                                                                                                                                                           | <input type="radio"/> ja | <input type="radio"/> nein |
| Attribute/Fähigkeiten von Personen, Personengruppen, Soldaten, Berufsgruppen, o.ä. können zunehmen (z. B. Schaden, Geschwindigkeit, Leistung, Stärke, Ausdauer etc.)                                                                                                                | <input type="radio"/> ja | <input type="radio"/> nein |
| <b>Währung im Spiel</b>                                                                                                                                                                                                                                                             |                          |                            |
| Virtuelles Geld, das sich auf echte Währungen bezieht (z. B. Euro, Dollar, ...)                                                                                                                                                                                                     | <input type="radio"/> ja | <input type="radio"/> nein |
| Virtuelles Geld, das sich auf Fantasiewährungen oder unspezifische Währungen bezieht (z. B. Geld/Money, Münzen/Coins, Scheine...)                                                                                                                                                   | <input type="radio"/> ja | <input type="radio"/> nein |
| Virtuelle Wertgegenstände (Gold, Silber, Juwelen, Edelsteine, Diamanten, Perlen, usw.)                                                                                                                                                                                              | <input type="radio"/> ja | <input type="radio"/> nein |
| <b>Durch das Fortschreiten des Spiels werden zusätzliche Spielfunktionen freigeschaltet</b>                                                                                                                                                                                         |                          |                            |
| Im Verlauf des Spiels kann ein zusätzlicher Schwierigkeitsgrad freigeschaltet werden (z. B. nachdem das Spiel abgeschlossen wurde, kommt ein neuer Schwierigkeitsgrad dazu oder ein Ranglistenmodus ist verfügbar, sobald ein bestimmter Erfahrungsgrad erreicht ist, etc.)         | <input type="radio"/> ja | <input type="radio"/> nein |
| Im Verlauf des Spiels werden zusätzliche Karten, Spielareale, Dungeons, Gebiete, Regionen, Stadtbezirke, Rennstrecken, Stadien oder Arenen freigeschaltet                                                                                                                           | <input type="radio"/> ja | <input type="radio"/> nein |
| Im Verlauf des Spiels werden zusätzliche Gebiete auf einer Spielweltkarte sichtbar gemacht (Erkunden neuer Gebiete im Open-World-Format)                                                                                                                                            | <input type="radio"/> ja | <input type="radio"/> nein |
| Im Verlauf des Spiels werden zusätzliche Aufgaben, Spielabschnitte, Missionen, Ziele, Quests, Liegen o.ä. freigeschaltet                                                                                                                                                            | <input type="radio"/> ja | <input type="radio"/> nein |
| Im Verlauf des Spiels werden zusätzliche Personen, Tiere, Kreaturen, Haustiere, Figuren, Charaktere, Charakterklassen, o.ä. freigeschaltet (z. B. nach einem bestimmten Spielabschnitt steht ein neuer Spielcharakter zur Verfügung, Freischalten von neuen Champions/Helden, o.ä.) | <input type="radio"/> ja | <input type="radio"/> nein |

**C2. Beschreiben Sie alle weiteren Belohnungsgruppen<sup>3</sup>, die in dem Spiel verfügbar sind, die den Belohnungsgruppen der vorangestellten Übersicht in C1 nicht eindeutig zuordnen werden können (Belohnungsgruppen, die bereits in C1 aufgeführt sind, werden hier nicht erneut aufgeführt).**

1.

2.

3.

4.

5.

## Electronic Supplementary Material

|     |
|-----|
| 6.  |
| 7.  |
| 8.  |
| 8.  |
| 9.  |
| 10. |

Gesamtanzahl der Belohnungsgruppen (wie in C1 und C2 angegeben): \_\_\_\_\_

| C3. Looten und Lootboxen                                                                                                                                                             |                          |                            |
|--------------------------------------------------------------------------------------------------------------------------------------------------------------------------------------|--------------------------|----------------------------|
| Spieler*innen können zufällig oder unvorhersehbare <sup>2</sup> vergebene Belohnungen durch das Looten (Ausbeuten, Durchsuchen) von Gegenständen, Körpern, Suchorten, o.ä. erhalten. | <input type="radio"/> ja | <input type="radio"/> nein |
| Spieler*innen können zufällig oder unvorhersehbare <sup>2</sup> vergebene Belohnungen durch das Öffnen von Beutekisten/Lootboxen, Schatztruhen, Kartendecks, o.ä. erhalten.          | <input type="radio"/> ja | <input type="radio"/> nein |

| C4. Spieler*innen können Belohnungen während des Spiels wieder verlieren <sup>9</sup>                                                                        |                          |                            |
|--------------------------------------------------------------------------------------------------------------------------------------------------------------|--------------------------|----------------------------|
| Belohnungen können verloren werden (z. B. erworbene Spielitems, Spielwährung, ...)                                                                           | <input type="radio"/> ja | <input type="radio"/> nein |
| Der/die Spieler*in kann alle Belohnungen in Hinblick auf mindestens eine Belohnungsgruppe vollständig verlieren (z. B. sämtliche erworbene Waffen verlieren) | <input type="radio"/> ja | <input type="radio"/> nein |
| Der/die Spieler*in kann praktisch alle im Spiel erreichten Belohnungen verlieren (Permadeath).                                                               | <input type="radio"/> ja | <input type="radio"/> nein |

| C5. Spieler*innen können Belohnungen bei Abwesenheit verlieren <sup>9</sup>                                                                                                  |                          |                            |
|------------------------------------------------------------------------------------------------------------------------------------------------------------------------------|--------------------------|----------------------------|
| In Abwesenheit kann der/die Spieler*in Belohnungschancen verpassen (z. B. Tagesquest, zeitlich befristete Angebote).                                                         | <input type="radio"/> ja | <input type="radio"/> nein |
| Belohnungen können bei Abwesenheit verloren werden (z. B. erworbene Spielitems, Spielwährung, ...).                                                                          | <input type="radio"/> ja | <input type="radio"/> nein |
| In Abwesenheit kann der/die Spieler*in alle Belohnungen in Hinblick auf mindestens eine Belohnungsgruppe vollständig verlieren (z. B. sämtliche erworbene Waffen verlieren). | <input type="radio"/> ja | <input type="radio"/> nein |
| In Abwesenheit kann der/die Spieler*in praktisch alle im Spiel erreichten Belohnungen verlieren (Permadeath).                                                                | <input type="radio"/> ja | <input type="radio"/> nein |

<sup>9</sup> Mit Verlust ist gemeint, dass Belohnungen verloren wird, ohne dafür einen Gegenwert zu erhalten. Nicht gemeint ist das Ausgeben von Spielwährung, der Verbrauch von Spielgütern oder die Herabstufung auf einer Rangliste).



## Electronic Supplementary Material

| <b>C6. Simulation von Glücksspiel</b>                                                                                                                                                                                                                                                      |                          |                            |
|--------------------------------------------------------------------------------------------------------------------------------------------------------------------------------------------------------------------------------------------------------------------------------------------|--------------------------|----------------------------|
| Wird in dem Spiel an irgendeiner Stelle Glücksspiel simuliert (z. B. Poker, Blackjack, andere Casinospiele, Slot Machines, Sportwetten, oder andere Formen des Glücksspiels)? Nicht gemeint sind abstrakte Darstellungen ohne unmittelbaren Bezug zu realen Glücksspielformen.             | <input type="radio"/> ja | <input type="radio"/> nein |
| <input type="checkbox"/> Falls ja: Machen Sie aussagekräftige Angaben dazu, welche Glücksspiele in welcher Weise und in welchem Teil des Spiels simuliert werden. Berücksichtigen Sie auch, wie stark glücksspielbezogene Inhalte gegenüber nicht-glücksspielbezogenen Inhalten ausfallen. |                          |                            |

  

| <b>C7. In-Game-Käufe</b>                                                                                                                                                                                                                                                                                                                    |                          |                            |
|---------------------------------------------------------------------------------------------------------------------------------------------------------------------------------------------------------------------------------------------------------------------------------------------------------------------------------------------|--------------------------|----------------------------|
| Es sind In-Game-Käufe gegen Echtgeld möglich.                                                                                                                                                                                                                                                                                               | <input type="radio"/> ja | <input type="radio"/> nein |
| <input type="checkbox"/> Falls ja: Machen Sie aussagekräftige Angaben zu den Maximalkosten, die für In-Game-Käufe von einem Spieler bzw. einer Spielerin in dem Spiel insgesamt aufgewendet werden können (alle möglichen Einkäufe summieren sich. Wenn Einkäufe auf unbestimmte Zeit wiederholt werden können, geben Sie "unbegrenzt" an). |                          |                            |

  

| <b>C8. Detaillierte Bewertung der In-Game-Käufe (nur auszufüllen, wenn In-Game-Käufe in dem Spiel möglich sind)</b>                                                                                                                                                                                                                       |                          |                            |
|-------------------------------------------------------------------------------------------------------------------------------------------------------------------------------------------------------------------------------------------------------------------------------------------------------------------------------------------|--------------------------|----------------------------|
| <input type="radio"/> Trifft nicht zu: Keine In-Game-Käufe möglich.                                                                                                                                                                                                                                                                       |                          |                            |
| Es sind In-Game-Käufe möglich, die den Spielerfolg <u>nicht</u> beeinflussen.                                                                                                                                                                                                                                                             | <input type="radio"/> ja | <input type="radio"/> nein |
| <input type="checkbox"/> Falls ja: Machen Sie aussagekräftige Angaben zu den diesbezüglich möglichen Käufen und den damit verbundenen Kosten, den Maximalkosten <sup>5</sup> für einzelne Käufe, und den Maximalkosten, die für Käufe dieser Art von einem Spieler bzw. einer Spielerin in dem Spiel insgesamt aufgewendet werden können. |                          |                            |

## Electronic Supplementary Material

|                                                                                                                                                                                                                                                                                                                                           |                          |                            |
|-------------------------------------------------------------------------------------------------------------------------------------------------------------------------------------------------------------------------------------------------------------------------------------------------------------------------------------------|--------------------------|----------------------------|
| Es sind In-Game-Käufe möglich, die den Spielerfolg direkt oder indirekt beeinflussen (z.B. In-Game-Käufe können dazu beitragen, das Vorankommen im Spiel zu erleichtern oder um Kämpfe im Spiel zu gewinnen).                                                                                                                             | <input type="radio"/> ja | <input type="radio"/> nein |
| <input type="checkbox"/> Falls ja: Machen Sie aussagekräftige Angaben zu den diesbezüglich möglichen Käufen und den damit verbundenen Kosten, den Maximalkosten <sup>5</sup> für einzelne Käufe, und den Maximalkosten, die für Käufe dieser Art von einem Spieler bzw. einer Spielerin in dem Spiel insgesamt aufgewendet werden können. |                          |                            |
| Ist der Erwerb von virtueller Spielwährung(en) möglich (z. B. Euro, Dollar, Taler, Geld/Money, Münzen/Coins, Gold, Silber, Juwelen, Edelsteine, Diamanten, Perlen, etc.)?                                                                                                                                                                 | <input type="radio"/> ja | <input type="radio"/> nein |
| <input type="checkbox"/> Falls ja: Machen Sie aussagekräftige Angaben zu den diesbezüglich möglichen Käufen und den damit verbundenen Kosten, den Maximalkosten für einzelne Käufe, und den Maximalkosten, die für Käufe dieser Art von einem Spieler bzw. einer Spielerin in dem Spiel insgesamt aufgewendet werden können.              |                          |                            |
| Es sind andere In-Game-Käufe möglich, die den oben abgefragten Punkten nicht zugeordnet werden können.                                                                                                                                                                                                                                    | <input type="radio"/> ja | <input type="radio"/> nein |
| <input type="checkbox"/> Falls ja: Machen Sie aussagekräftige Angaben zu den diesbezüglich möglichen Käufen und den damit verbundenen Kosten, den Maximalkosten <sup>5</sup> für einzelne Käufe, und den Maximalkosten, die für Käufe dieser Art von einem Spieler bzw. einer Spielerin in dem Spiel insgesamt aufgewendet werden können. |                          |                            |

### C9. Weiterverkauf von Belohnungen. Mindestens eine im Spiel zu erwerbende Belohnungsgruppe kann eingetauscht werden...

|                                                                                                                            |                          |                            |
|----------------------------------------------------------------------------------------------------------------------------|--------------------------|----------------------------|
| gegen eine virtuelle Spielwährung oder ein anderes virtuelles Wertäquivalent, welches gegen Echtgeld verkauft werden kann. | <input type="radio"/> ja | <input type="radio"/> nein |
| gegen Echtgeld (z.B. im Rahmen von Auktionen, Verkäufen oder als Spieleinsatz für mögliche Echtgeldgewinne).               | <input type="radio"/> ja | <input type="radio"/> nein |

## Electronic Supplementary Material

| <b>C10. Auszeichnungen für exzessives Spielverhalten</b>                                                                                                                                                                                                                                            |                          |                            |
|-----------------------------------------------------------------------------------------------------------------------------------------------------------------------------------------------------------------------------------------------------------------------------------------------------|--------------------------|----------------------------|
| Erhalten Spieler*innen Auszeichnungen (Achievements, Trophäen, Medaillen oder ähnliches), die nur durch besonders lange Spielzeiten erreicht werden können?                                                                                                                                         | <input type="radio"/> ja | <input type="radio"/> nein |
| <input type="checkbox"/> Falls ja: Machen Sie aussagekräftige Angaben dazu, welche Achievements/ Auszeichnungen erreicht werden können, welche Bedingungen für diese erfüllt werden müssen und wie viel Spielzeit Spieler*innen zum Erreichen dieser Achievements voraussichtlich benötigen werden. |                          |                            |

| <b>C11. Bedeutung kooperativer sozialer Interaktionen (nur bei Spiel anzugeben, die als Onlinespiel zu charakterisieren sind oder einen Onlinespielmodus beinhalten).</b>         |                          |                            |
|-----------------------------------------------------------------------------------------------------------------------------------------------------------------------------------|--------------------------|----------------------------|
| <input type="radio"/> Trifft nicht zu: Kein Onlinespiel und kein Onlinespielmodus                                                                                                 |                          |                            |
| Soziale Kooperationen sind optional möglich. Alle Aufgaben im Spiel können aber genauso einfach alleine bewältigt werden.                                                         | <input type="radio"/> ja | <input type="radio"/> nein |
| Soziale Kooperationen mit anderen Spieler*innen erleichtern das Spiel oder das Erfüllen bestimmter Spielaufgaben.                                                                 | <input type="radio"/> ja | <input type="radio"/> nein |
| Soziale Kooperationen sind zwingend notwendig, um bestimmte Aufgaben zu erfüllen, bestimmte Belohnungen zu erwerben oder um in dem Spiel in einer sinnvollen Weise voranzukommen. | <input type="radio"/> ja | <input type="radio"/> nein |

### D) Schadensminimierende Spielmerkmale

| <b>D1. Feedback zur Spielzeit</b>                                                                                                                                  |                          |                            |
|--------------------------------------------------------------------------------------------------------------------------------------------------------------------|--------------------------|----------------------------|
| Werden während des laufenden Spiels direkte Rückmeldungen zur Spielzeit oder Warnmeldungen bei zu langer ununterbrochener Spielzeit auszugeben?                    | <input type="radio"/> ja | <input type="radio"/> nein |
| <input type="checkbox"/> Falls ja: Machen Sie aussagekräftige Angaben dazu, wann die Spieler*innen welche Form der Rückmeldung zu ihrer Spielzeit erhalten sollen. |                          |                            |

## Electronic Supplementary Material

| <b>D2. Informationen über finanzielle Ausgaben (nur bei Spielen auszufüllen, bei denen In-Game-Käufen möglich sind)</b>                                                                                                 |                          |                            |
|-------------------------------------------------------------------------------------------------------------------------------------------------------------------------------------------------------------------------|--------------------------|----------------------------|
| <input type="radio"/> Trifft nicht zu: Keine In-Game-Käufe möglich.                                                                                                                                                     |                          |                            |
| Erhalten Spieler*innen <u>vor</u> ihrer Spielteilnahme eine <u>vollständige</u> Offenlegung über die finanziellen Ausgaben, die mit dem Spiel verbunden sind (einzelne Kaufoptionen und maximal mögliche Geldausgaben)? | <input type="radio"/> ja | <input type="radio"/> nein |
| <input type="checkbox"/> Falls ja: Machen Sie aussagekräftige Angaben über alle Informationen, die den Spieler*innen gegeben werden.                                                                                    |                          |                            |

| <b>D3. Aufklärung von Spieler*innen über Risiken der Computerspielnutzung</b>                                                                                                                            |                          |                            |
|----------------------------------------------------------------------------------------------------------------------------------------------------------------------------------------------------------|--------------------------|----------------------------|
| Erhalten Spieler*innen Informationen zu möglichen Risiken einer Spielstörung (z.B. Kontrollverlust, mögliche Beeinträchtigungen aufgrund übermäßiger Ausgaben oder Vernachlässigung wichtiger Aufgaben)? | <input type="radio"/> ja | <input type="radio"/> nein |
| <input type="checkbox"/> Falls ja: Machen Sie aussagekräftige Angaben dazu, wie Spieler*innen aufgeklärt werden und welche Informationen sie erhalten.                                                   |                          |                            |

| <b>D4. Spielzeitbegrenzungen</b>                                                                                                                   |                          |                            |
|----------------------------------------------------------------------------------------------------------------------------------------------------|--------------------------|----------------------------|
| Sind in dem Spiel anbieterseitig Spielzeitbegrenzungen <sup>10</sup> festgelegt?                                                                   | <input type="radio"/> ja | <input type="radio"/> nein |
| <input type="checkbox"/> Falls ja: Machen Sie aussagekräftige Angaben dazu, in welcher Weise die Spieler*innen in ihrer Spielzeit begrenzt werden. |                          |                            |

| <b>D5. Mittel der Selbstbegrenzung</b>                                                                                                      |                          |                            |
|---------------------------------------------------------------------------------------------------------------------------------------------|--------------------------|----------------------------|
| Bietet das Spiel Optionen zum Festlegen von Zeit- oder Ausgabenlimits <sup>11</sup> ?                                                       | <input type="radio"/> ja | <input type="radio"/> nein |
| <input type="checkbox"/> Falls ja: Machen Sie aussagekräftige Angaben dazu, welche diesbezüglichen Optionen Spieler*innen angeboten werden. |                          |                            |

<sup>10</sup> Beispiele könnten anbieterseitige Obergrenzen für tägliche oder wöchentliche Spielzeiten sein oder spezifische Uhrzeiten (z. B. nachts), zu denen das Spiel nicht genutzt werden kann.

<sup>11</sup> Spieler können im Voraus Spielzeitlimits oder finanzielle Begrenzungen festlegen, die dann nicht mehr überschritten werden können. Darüber hinaus können Selbstbegrenzungen aktiviert werden, die die Nutzung des Spiels für bestimmte Tage, Tageszeiten, Zeiträume oder Zahlungsmethoden blockieren. Die Limits müssen vom Spieler selbst definiert werden und dürfen für eine bestimmte Zeit nach der Definition nicht mehr geändert werden (Kindersicherungssysteme der Plattformen oder über Dritte sind nicht gemeint).

## Electronic Supplementary Material

| <b>D6. Weitere präventive Maßnahmen</b>                                                                                                                                          |                          |                            |
|----------------------------------------------------------------------------------------------------------------------------------------------------------------------------------|--------------------------|----------------------------|
| Gibt es weitere Maßnahmen im Spiel, die oben nicht zugeordnet werden können (C11 bis C15) und die den Spielern helfen könnten in einer angemessen und gesunden Weise zu spielen? | <input type="radio"/> ja | <input type="radio"/> nein |
| <input type="checkbox"/> Falls ja: Machen Sie aussagekräftige Angaben über weitere präventive Maßnahmen.                                                                         |                          |                            |

## Auswertungsinstruktionen

### I) Empfohlene Altersklassifikation

Spiele mit 1) einer strukturellen Nähe zu Glücksspielen, 2) möglichen In-Game-Käufen, die für Minderjährige unangemessen hoch sind, 3) einer persistenten Spielwelt, die eindeutig einem kontrollierten und gesunden Spielverhalten entgegensteht oder 4) einem möglichen Weiterverkauf von Belohnungen gegen Echtgeld müssen für Minderjährige als ungeeignet betrachtet werden (18+).

- 1) Eine strukturelle Nähe des Spiels zum Glücksspiel liegt vor, wenn Kriterium B1 erfüllt ist.
- 2) Unangemessen hohe In-Game-Käufe: Kriterium ist erfüllt, wenn die möglichen Gesamtausgaben für ein Spiel 500 Euro oder 500 US-Dollar überschreiten oder unbegrenzt sind (C7).
- 3) Eine persistente Spielwelt die für Minderjährige ungeeignet ist liegt vor, wenn Spieler während ihrer Abwesenheit vom Spiel alle Belohnungen mindestens einer Belohnungsgruppe verlieren können (C5).
- 4) Weiterverkauf von Belohnungen gegen Echtgeld: Wird erfüllt, wenn mindestens eine Belohnungsgruppe gegen Echtgeld eingetauscht werden kann.

Wenn das Spiel für Minderjährige geeignet ist, muss überprüft werden, ob andere Merkmale des Spiels ein hohes Risiko für bestimmte minderjährige Altersgruppen beinhalten (siehe Tabelle 1, rote und gelbe Markierungen sowie Altersklassifikation). Um eine Altersempfehlung für Minderjährige ableiten zu können, müssen alle Einzelkriterien C1 bis C11 berücksichtigt werden. **Die höchste einzelne Altersklassifikation bestimmt die Altersempfehlung des Spiels.**

Beispielhafte Erläuterung zu Geldausgaben für In-Game-Käufe (C7):

- Altersgruppen „Ab 0 Jahren“ und „Ab 6 Jahren“: In-Game-Käufe sind unabhängig von ihrer Höhe und Ausgestaltung altersunangemessen.
- Altersgruppe „Ab 12 Jahren“: Die Gesamtausgaben pro Spieler und Spiel dürfen 100 Euro nicht überschreiten.
- Altersgruppe „Ab 16 Jahren“: Die Gesamtausgaben pro Spieler und Spiel dürfen 250 Euro nicht überschreiten.

### II) Allgemeine Risikobewertung für problematisches Spielverhalten

Die elf Kriterien C1 bis C11 werden verwendet, um das allgemeine Risikopotenzial des Spiels hinsichtlich der Stimulierung von problematischem Spielverhalten bei vulnerablen Spielern abzuschätzen (siehe Tabelle 1). Basierend auf allen Einzelbewertungen (kein Risiko = 0 Punkte, mittleres Risiko = 1 Punkt, hohes Risiko = 2 Punkte) wird ein Summenwert berechnet. Da die Kriterien C1 und C2 gemeinsam verrechnet werden und die Anzahl der Belohnungsgruppen als ein Hauptindikator für die Komplexität des Belohnungssystems für die Einschätzung des Risikopotenzials von besonderer Relevanz sein dürfte, werden diese Informationen doppelt gewichtet, wobei maximal 4 Punkten erreicht werden können. Somit liegt der mögliche Summenwert zwischen 0 und 22 Punkten. **Ein höherer Summenwert weist auf ein höheres Risiko für ein problematisches Spielverhalten hin, wenn vulnerable Spieler\*innen das Spiel nutzen. Diese allgemeine Risikobewertung sollte auch berücksichtigt werden, um die mit einem Spiel verbundenen Risiken für eine bestimmte Altersgruppe oder Risikopopulation zu bewerten.**

### III) Schadensminimierende Spielmerkmale

Die sechs Kriterien (D1 bis D6) werden in die Tabelle aufgenommen, um einen Überblick über in dem Spiel vorhandene risikominimierende Merkmale zu erhalten. Sie können verwendet werden, um fachliche Abwägungen darüber zu treffen, inwieweit dem gegebenen Risikopotential eines Spiels durch wirksame risikominimierende Merkmale begegnet wird.

# Electronic Supplementary Material

**Tabelle 1.** Risikobewertung des Spiels

| Risikoparameter                                             | Kein Risiko                                                                                    | Mittleres Risiko                                                                                   | Hohes Risiko                                                                                                        |
|-------------------------------------------------------------|------------------------------------------------------------------------------------------------|----------------------------------------------------------------------------------------------------|---------------------------------------------------------------------------------------------------------------------|
| <b>Anzahl von Belohnungsgruppen (C1 und C2 aufsummiert)</b> | Bis 9<br>○<br><b>(0 Punkte)</b>                                                                | 10 bis 19<br>○<br><b>(2 Punkte)</b>                                                                | 20 und mehr<br>○<br><b>(4 Punkte)</b>                                                                               |
|                                                             | 0+ Jahre<br>6+ Jahre<br>12+ Jahre<br>16+ Jahre<br>18+ Jahre                                    | 0+ Jahre<br>6+ Jahre<br>12+ Jahre<br>16+ Jahre<br>18+ Jahre                                        | 0+ Jahre<br>6+ Jahre<br>12+ Jahre<br>16+ Jahre<br>18+ Jahre                                                         |
| <b>Looten, Lootboxen (C3)</b>                               | Looten nicht möglich und keine Lootboxen verfügbar.<br><br>○<br><b>(0 Punkte)</b>              | Looten möglich <u>oder</u> Lootboxen verfügbar. <sup>12</sup><br><br>○<br><b>(1 Punkt)</b>         | Looten möglich <u>und</u> Lootboxen verfügbar. <sup>8</sup><br><br>○<br><b>(2 Punkte)</b>                           |
|                                                             | 0+ Jahre<br>6+ Jahre<br>12+ Jahre<br>16+ Jahre<br>18+ Jahre                                    | 0+ Jahre<br>6+ Jahre<br>12+ Jahre<br>16+ Jahre<br>18+ Jahre                                        | 0+ Jahre<br>6+ Jahre<br>12+ Jahre<br>16+ Jahre<br>18+ Jahre                                                         |
| <b>Verlust von Belohnungen während des Spiels (C4)</b>      | Keine Verluste oder nur Verluste einzelner Belohnungen möglich.<br><br>○<br><b>(0 Punkte)</b>  | Verluste aller Belohnungen mindestens einer Belohnungsgruppe möglich.<br><br>○<br><b>(1 Punkt)</b> | Permadeath möglich.<br><br>○<br><b>(2 Punkte)</b>                                                                   |
|                                                             | 0+ Jahre<br>6+ Jahre<br>12+ Jahre<br>16+ Jahre<br>18+ Jahre                                    | 0+ Jahre<br>6+ Jahre<br>12+ Jahre<br>16+ Jahre<br>18+ Jahre                                        | 0+ Jahre<br>6+ Jahre<br>12+ Jahre<br>16+ Jahre<br>18+ Jahre                                                         |
| <b>Verlust von Belohnungen bei Abwesenheit (C5)</b>         | Keine Verluste oder nur Verpassen von Belohnungschancen möglich.<br><br>○<br><b>(0 Punkte)</b> | Verluste einzelner Belohnungen möglich.<br><br>○<br><b>(1 Punkt)</b>                               | Verluste aller Belohnungen mindestens einer Belohnungsgruppe oder Permadeath möglich.<br><br>○<br><b>(2 Punkte)</b> |
|                                                             | 0+ Jahre<br>6+ Jahre<br>12+ Jahre<br>16+ Jahre<br>18+ Jahre                                    | 0+ Jahre<br>6+ Jahre<br>12+ Jahre<br>16+ Jahre<br>18+ Jahre                                        | 0+ Jahre<br>6+ Jahre<br>12+ Jahre<br>16+ Jahre<br>18+ Jahre                                                         |

<sup>12</sup> Dies unterscheidet sich von den Lootboxen, die in den B-Kriterien bewertet wurden.

# Electronic Supplementary Material

| Risikoparameter                                      | Kein Risiko                   | Mittleres Risiko                                                                                                                                        | Hohes Risiko                                                                                                                                               |
|------------------------------------------------------|-------------------------------|---------------------------------------------------------------------------------------------------------------------------------------------------------|------------------------------------------------------------------------------------------------------------------------------------------------------------|
| <b>Simulation von Glücksspiel (C6)</b>               | Kein simuliertes Glücksspiel. | Glücksspiel ist ein Randmerkmal der Spielhandlung (z. B. im Laufe der Spielgeschichte kann an einer Pokerrunde um virtuelles Geld teilgenommen werden). | Glücksspiel stellt den hauptsächlichen oder ausschließlichen Bestandteil des Spielinhalts dar (z. B. es werden Pokerspiele um fiktives Geld nachgestellt). |
|                                                      | ○                             | ○                                                                                                                                                       | ○                                                                                                                                                          |
|                                                      | <b>(0 Punkte)</b>             | <b>(1 Punkt)</b>                                                                                                                                        | <b>(2 Punkte)</b>                                                                                                                                          |
|                                                      | 0+ Jahre                      | 0+ Jahre                                                                                                                                                | 0+ Jahre                                                                                                                                                   |
|                                                      | 6+ Jahre                      | 6+ Jahre                                                                                                                                                | 6+ Jahre                                                                                                                                                   |
| 12+ Jahre                                            | 12+ Jahre                     | 12+ Jahre                                                                                                                                               |                                                                                                                                                            |
| 16+ Jahre                                            | 16+ Jahre                     | 16+ Jahre                                                                                                                                               |                                                                                                                                                            |
| 18+ Jahre                                            | 18+ Jahre                     | 18+ Jahre                                                                                                                                               |                                                                                                                                                            |
| <b>In-Game-Käufe (C7)</b>                            | Keine In-Game-Käufe möglich.  | Gesamtausgaben pro Spieler*in überschreiten nicht 100€/\$ (12+), überschreiten nicht 250€/\$ (16+), überschreiten nicht 500€/\$ (18+).                  | Gesamtausgaben pro Spieler*in überschreiten 500€/\$ oder sind unlimitiert.                                                                                 |
|                                                      | ○                             | ○                                                                                                                                                       | ○                                                                                                                                                          |
|                                                      | <b>(0 Punkte)</b>             | <b>(1 Punkt)</b>                                                                                                                                        | <b>(2 Punkte)</b>                                                                                                                                          |
|                                                      | 0+ Jahre                      | 0+ Jahre                                                                                                                                                | 0+ Jahre                                                                                                                                                   |
|                                                      | 6+ Jahre                      | 6+ Jahre                                                                                                                                                | 6+ Jahre                                                                                                                                                   |
| 12+ Jahre                                            | 12+ Jahre                     | 12+ Jahre                                                                                                                                               |                                                                                                                                                            |
| 16+ Jahre                                            | 16+ Jahre                     | 16+ Jahre                                                                                                                                               |                                                                                                                                                            |
| 18+ Jahre                                            | 18+ Jahre                     | 18+ Jahre                                                                                                                                               |                                                                                                                                                            |
| <b>Detaillierte Bewertung der In-Game-Käufe (C8)</b> | Keine In-Game-Käufe möglich.  | In-Game-Käufe möglich. Kein Einfluss auf den Spielerfolg.                                                                                               | In-Game-Käufe mit Einfluss auf den Spielerfolg möglich. <u>oder</u> Kauf einer fiktiven Spielwährung oder eines fiktiven Wertäquivalents möglich.          |
|                                                      | ○                             | ○                                                                                                                                                       | ○                                                                                                                                                          |
|                                                      | <b>(0 Punkte)</b>             | <b>(1 Punkt)</b>                                                                                                                                        | <b>(2 Punkte)</b>                                                                                                                                          |
|                                                      | 0+ Jahre                      | 0+ Jahre                                                                                                                                                | 0+ Jahre                                                                                                                                                   |
|                                                      | 6+ Jahre                      | 6+ Jahre                                                                                                                                                | 6+ Jahre                                                                                                                                                   |
| 12+ Jahre                                            | 12+ Jahre                     | 12+ Jahre                                                                                                                                               |                                                                                                                                                            |
| 16+ Jahre                                            | 16+ Jahre                     | 16+ Jahre                                                                                                                                               |                                                                                                                                                            |
| 18+ Jahre                                            | 18+ Jahre                     | 18+ Jahre                                                                                                                                               |                                                                                                                                                            |



# Electronic Supplementary Material

| Risikoparameter                               | Kein Risiko                                                                                                                                                                           | Mittleres Risiko                                                                                                                                                                                                              | Hohes Risiko                                                                                                                                                                                          |
|-----------------------------------------------|---------------------------------------------------------------------------------------------------------------------------------------------------------------------------------------|-------------------------------------------------------------------------------------------------------------------------------------------------------------------------------------------------------------------------------|-------------------------------------------------------------------------------------------------------------------------------------------------------------------------------------------------------|
| <b>Weiterverkauf von Belohnungen (C9)</b>     | Kein Weiterverkauf von Belohnungen möglich.<br><br><input type="radio"/><br><b>(0 Punkte)</b>                                                                                         | Mindestens eine im Spiel verfügbare Belohnungsgruppe kann gegen ein virtuelles Wertäquivalent eingetauscht werden, welches wiederum gegen Echtgeld eingetauscht werden kann.<br><br><input type="radio"/><br><b>(1 Punkt)</b> | Mindestens eine im Spiel verfügbare Belohnungsgruppe kann gegen Echtgeld eingetauscht werden.<br><br><input type="radio"/><br><b>(2 Punkte)</b>                                                       |
|                                               | 0+ Jahre<br>6+ Jahre<br>12+ Jahre<br>16+ Jahre<br>18+ Jahre                                                                                                                           | 0+ Jahre<br>6+ Jahre<br>12+ Jahre<br>16+ Jahre<br>18+ Jahre                                                                                                                                                                   | 0+ Jahre<br>6+ Jahre<br>12+ Jahre<br>16+ Jahre<br>18+ Jahre                                                                                                                                           |
| <b>Umfangreiche Spielauszeichnungen (C10)</b> | Nicht vorgesehen.<br><br><input type="radio"/><br><b>(0 Punkte)</b>                                                                                                                   | Achievements für eine hohe Anzahl wiederholter (repetitiver) Spielaktionen vorgesehen.<br><br><input type="radio"/><br><b>(1 Punkt)</b>                                                                                       | Achievements für besonders lange Spielzeiten vorgesehen.<br><br><input type="radio"/><br><b>(2 Punkte)</b>                                                                                            |
|                                               | 0+ Jahre<br>6+ Jahre<br>12+ Jahre<br>16+ Jahre<br>18+ Jahre                                                                                                                           | 0+ Jahre<br>6+ Jahre<br>12+ Jahre<br>16+ Jahre<br>18+ Jahre                                                                                                                                                                   | 0+ Jahre<br>6+ Jahre<br>12+ Jahre<br>16+ Jahre<br>18+ Jahre                                                                                                                                           |
| <b>Soziale Interaktionen (C11)</b>            | Nicht vorgesehen. <u>oder</u><br>Nur optional möglich, wobei alle Aufgaben im Spiel genauso einfach allein bewältigt werden können.<br><br><input type="radio"/><br><b>(0 Punkte)</b> | Soziale Interaktionen mit anderen Spieler*innen erleichtern das Spiel oder das Erfüllen bestimmter Aufgaben.<br><br><input type="radio"/><br><b>(1 Punkt)</b>                                                                 | Soziale Interaktionen sind zwingend notwendig, um bestimmte Aufgaben zu erfüllen, bestimmte Belohnungen zu erwerben oder um im Spiel voranzukommen.<br><br><input type="radio"/><br><b>(2 Punkte)</b> |
|                                               | 0+ Jahre<br>6+ Jahre<br>12+ Jahre<br>16+ Jahre<br>18+ Jahre                                                                                                                           | 0+ Jahre<br>6+ Jahre<br>12+ Jahre<br>16+ Jahre<br>18+ Jahre                                                                                                                                                                   | 0+ Jahre<br>6+ Jahre<br>12+ Jahre<br>16+ Jahre<br>18+ Jahre                                                                                                                                           |

# Electronic Supplementary Material

**Anmerkungen:** Rote Markierung = Basierend auf dieser Einzelfeststellung nicht geeignet für die diese Altersgruppe. Gelbe Markierung = Basierend auf dieser Einzelfeststellung ggfls. nicht geeignet für diese Altersgruppe.

## Gesamtergebnis

| <b>I) Empfohlene Altersklassifikation</b> |                       |                       |                       |                       |
|-------------------------------------------|-----------------------|-----------------------|-----------------------|-----------------------|
| <b>0+ Jahre</b>                           | <b>6+ Jahre</b>       | <b>12+ Jahre</b>      | <b>16+ Jahre</b>      | <b>18+ Jahre</b>      |
| <input type="radio"/>                     | <input type="radio"/> | <input type="radio"/> | <input type="radio"/> | <input type="radio"/> |

| <b>II) Allgemeine Risikobewertung für dysfunktionales und problematisches Spielverhalten</b><br>(0 = sehr geringes Risiko bis 22 = sehr hohes Risiko) |    |    |    |    |    |    |    |    |    |    |    |    |    |    |    |    |    |    |    |    |    |    |
|-------------------------------------------------------------------------------------------------------------------------------------------------------|----|----|----|----|----|----|----|----|----|----|----|----|----|----|----|----|----|----|----|----|----|----|
| 00                                                                                                                                                    | 01 | 02 | 03 | 04 | 05 | 06 | 07 | 08 | 09 | 10 | 11 | 12 | 13 | 14 | 15 | 16 | 17 | 18 | 19 | 20 | 21 | 22 |
|                                                                                                                                                       |    |    |    |    |    |    |    |    |    |    |    |    |    |    |    |    |    |    |    |    |    |    |

| <b>III) Schadensminimierende Merkmale</b>   | <b>Ja</b>             | <b>Nein</b>           |
|---------------------------------------------|-----------------------|-----------------------|
| D1) Feedback zur Spielzeit                  | <input type="radio"/> | <input type="radio"/> |
| D2) Informationen über finanzielle Ausgaben | <input type="radio"/> | <input type="radio"/> |
| D3) Aufklärung von Spielern über Risiken    | <input type="radio"/> | <input type="radio"/> |
| D4) Spielzeitbegrenzung                     | <input type="radio"/> | <input type="radio"/> |
| D5) Mittel der Selbstbegrenzung             | <input type="radio"/> | <input type="radio"/> |
| D6) Weitere präventive Maßnahmen            | <input type="radio"/> | <input type="radio"/> |
